# Supplementary material for: Heavy Rydberg states: large amplitude vibrations
Source: Royal Society of Chemistry journal article supplement (doi:10.1039/c8fd00096d), 2018-01-01
Supplement: c8fd00096d1.pdf [file c8fd00096d1.pdf]

## Heavy Rydberg States: extremely large amplitude vibrations

Adam Kirrander,\* Christian Jungen, Robert Donovan, and Kenneth Lawley  
(Dated: May 20, 2018)

---

\* Adam.Kirrander@ed.ac.uk

TABLE I. Table of energy, effective quantum number, and width at half maximum in  $\text{cm}^{-1}$  for the resonances  $n = 130 - 190$  for  $J = 0 - 2$ . The resonances are calculated from the spectrum calculated from the total eigenphase of scattering matrix  $\mathbf{S}$ .

| $J = 0$   |        |                            | $J = 1$   |        |                            | $J = 2$   |        |                            |
|-----------|--------|----------------------------|-----------|--------|----------------------------|-----------|--------|----------------------------|
| E (au)    | $n$    | width ( $\text{cm}^{-1}$ ) | E (au)    | $n$    | width ( $\text{cm}^{-1}$ ) | E (au)    | $n$    | width ( $\text{cm}^{-1}$ ) |
| -0.554933 | 129.99 | 22.167 <sup>a</sup>        | -0.554889 | 130.09 | 32.512 <sup>a</sup>        | -0.554781 | 130.35 | 15.782 <sup>a</sup>        |
| -0.554634 | 130.71 | 25.821                     | -0.554616 | 130.75 | 26.580                     | -0.554563 | 130.88 | 26.506                     |
| -0.554260 | 131.63 | 22.228                     | -0.554246 | 131.66 | 22.211                     | -0.554218 | 131.73 | 23.705                     |
| -0.553887 | 132.56 | 19.507                     | -0.553873 | 132.60 | 20.244                     | -0.553849 | 132.66 | 20.963                     |
| -0.553518 | 133.51 | 18.364                     | -0.553505 | 133.54 | 18.349                     | -0.553482 | 133.60 | 19.055                     |
| -0.553157 | 134.45 | 17.979                     | -0.553144 | 134.49 | 17.965                     | -0.553121 | 134.55 | 17.941                     |
| -0.552804 | 135.40 | 16.899                     | -0.552791 | 135.43 | 16.890                     | -0.552769 | 135.49 | 17.568                     |
| -0.552458 | 136.34 | 16.550                     | -0.552445 | 136.38 | 17.228                     | -0.552423 | 136.44 | 16.516                     |
| -0.552116 | 137.30 | 16.885                     | -0.552104 | 137.33 | 16.872                     | -0.552082 | 137.39 | 16.850                     |
| -0.551781 | 138.25 | 17.198                     | -0.551769 | 138.29 | 17.188                     | -0.551748 | 138.35 | 16.504                     |
| -0.551450 | 139.21 | 17.493                     | -0.551441 | 139.24 | 17.483                     | -0.551420 | 139.30 | 16.812                     |
| -0.551126 | 140.18 | 17.135                     | -0.551117 | 140.20 | 17.758                     | -0.551097 | 140.26 | 17.103                     |
| -0.550808 | 141.14 | 16.787                     | -0.550799 | 141.16 | 17.398                     | -0.550780 | 141.22 | 16.756                     |
| -0.550497 | 142.10 | 16.448                     | -0.550488 | 142.13 | 17.047                     | -0.550469 | 142.19 | 16.418                     |
| -0.550192 | 143.06 | 16.119                     | -0.550181 | 143.10 | 16.705                     | -0.550165 | 143.15 | 16.684                     |
| -0.549893 | 144.02 | 15.798                     | -0.549882 | 144.06 | 15.786                     | -0.549864 | 144.12 | 16.352                     |
| -0.549600 | 144.99 | 16.057                     | -0.549589 | 145.02 | 15.474                     | -0.549571 | 145.08 | 15.455                     |
| -0.549310 | 145.96 | 15.178                     | -0.549302 | 145.98 | 15.170                     | -0.549285 | 146.04 | 15.151                     |
| -0.549029 | 146.92 | 14.882                     | -0.549019 | 146.95 | 14.322                     | -0.549004 | 147.01 | 14.304                     |
| -0.548750 | 147.89 | 14.051                     | -0.548743 | 147.92 | 14.583                     | -0.548726 | 147.98 | 14.565                     |
| -0.548480 | 148.85 | 14.309                     | -0.548470 | 148.89 | 13.771                     | -0.548455 | 148.94 | 13.754                     |
| -0.548212 | 149.82 | 13.514                     | -0.548205 | 149.85 | 13.505                     | -0.548188 | 149.91 | 14.009                     |
| -0.547951 | 150.79 | 13.255                     | -0.547942 | 150.82 | 13.248                     | -0.547926 | 150.88 | 13.232                     |
| -0.547694 | 151.76 | 13.002                     | -0.547685 | 151.79 | 12.996                     | -0.547669 | 151.85 | 12.980                     |
| -0.547441 | 152.73 | 12.266                     | -0.547434 | 152.75 | 12.749                     | -0.547419 | 152.82 | 12.734                     |
| -0.547193 | 153.70 | 12.035                     | -0.547186 | 153.73 | 12.509                     | -0.547171 | 153.79 | 12.494                     |
| -0.546950 | 154.67 | 11.810                     | -0.546943 | 154.70 | 12.275                     | -0.546928 | 154.76 | 12.261                     |
| -0.546711 | 155.64 | 11.590                     | -0.546704 | 155.67 | 12.047                     | -0.546690 | 155.73 | 12.033                     |
| -0.546476 | 156.61 | 11.376                     | -0.546468 | 156.65 | 11.369                     | -0.546454 | 156.71 | 11.811                     |
| -0.546246 | 157.58 | 11.167                     | -0.546238 | 157.62 | 11.160                     | -0.546224 | 157.68 | 11.147                     |
| -0.546019 | 158.56 | 10.961                     | -0.546013 | 158.59 | 10.956                     | -0.545999 | 158.65 | 10.943                     |
| -0.545797 | 159.53 | 10.762                     | -0.545789 | 159.57 | 10.326                     | -0.545775 | 159.63 | 10.314                     |
| -0.545577 | 160.51 | 10.145                     | -0.545571 | 160.54 | 10.561                     | -0.545558 | 160.60 | 10.549                     |
| -0.545364 | 161.48 | 9.961                      | -0.545356 | 161.52 | 9.956                      | -0.545343 | 161.58 | 9.945                      |
| -0.545152 | 162.46 | 9.784                      | -0.545146 | 162.49 | 9.777                      | -0.545133 | 162.55 | 9.766                      |
| -0.544946 | 163.44 | 9.609                      | -0.544938 | 163.47 | 9.604                      | -0.544926 | 163.53 | 9.594                      |
| -0.544741 | 164.42 | 9.438                      | -0.544734 | 164.45 | 9.434                      | -0.544722 | 164.51 | 9.423                      |
| -0.544541 | 165.39 | 8.886                      | -0.544535 | 165.42 | 9.267                      | -0.544523 | 165.48 | 9.257                      |
| -0.544344 | 166.37 | 8.730                      | -0.544338 | 166.40 | 8.726                      | -0.544326 | 166.46 | 8.716                      |
| -0.544150 | 167.35 | 8.577                      | -0.544145 | 167.38 | 8.573                      | -0.544133 | 167.44 | 8.564                      |
| -0.543960 | 168.33 | 8.428                      | -0.543954 | 168.36 | 8.424                      | -0.543943 | 168.42 | 8.415                      |
| -0.543772 | 169.31 | 8.283                      | -0.543768 | 169.34 | 8.279                      | -0.543756 | 169.40 | 8.270                      |
| -0.543589 | 170.29 | 7.787                      | -0.543584 | 170.32 | 8.137                      | -0.543573 | 170.38 | 8.128                      |
| -0.543408 | 171.27 | 7.655                      | -0.543403 | 171.30 | 7.998                      | -0.543392 | 171.36 | 7.990                      |
| -0.543230 | 172.25 | 7.866                      | -0.543226 | 172.28 | 7.520                      | -0.543215 | 172.34 | 7.854                      |
| -0.543056 | 173.23 | 7.733                      | -0.543051 | 173.26 | 7.393                      | -0.543041 | 173.32 | 7.386                      |
| -0.542884 | 174.21 | 7.273                      | -0.542878 | 174.25 | 7.269                      | -0.542868 | 174.31 | 7.262                      |
| -0.542715 | 175.19 | 7.151                      | -0.542710 | 175.23 | 6.823                      | -0.542699 | 175.29 | 7.141                      |
| -0.542548 | 176.18 | 7.033                      | -0.542544 | 176.21 | 7.028                      | -0.542533 | 176.27 | 7.021                      |
| -0.542385 | 177.16 | 6.602                      | -0.542379 | 177.19 | 6.913                      | -0.542369 | 177.25 | 6.905                      |
| -0.542223 | 178.15 | 6.802                      | -0.542219 | 178.17 | 6.490                      | -0.542209 | 178.23 | 6.483                      |
| -0.542065 | 179.13 | 6.386                      | -0.542061 | 179.15 | 6.687                      | -0.542051 | 179.21 | 6.680                      |
| -0.541910 | 180.11 | 6.582                      | -0.541904 | 180.14 | 6.279                      | -0.541895 | 180.20 | 6.273                      |
| -0.541756 | 181.10 | 6.181                      | -0.541752 | 181.12 | 6.178                      | -0.541742 | 181.18 | 6.172                      |
| -0.541605 | 182.08 | 6.081                      | -0.541600 | 182.11 | 6.078                      | -0.541591 | 182.17 | 6.072                      |
| -0.541456 | 183.06 | 5.983                      | -0.541452 | 183.09 | 5.696                      | -0.541443 | 183.15 | 5.975                      |
| -0.541309 | 184.05 | 5.607                      | -0.541305 | 184.08 | 5.885                      | -0.541297 | 184.14 | 5.879                      |
| -0.541166 | 185.03 | 5.794                      | -0.541161 | 185.07 | 5.791                      | -0.541152 | 185.13 | 5.785                      |
| -0.541024 | 186.02 | 5.703                      | -0.541020 | 186.05 | 5.428                      | -0.541012 | 186.11 | 5.423                      |
| -0.540884 | 187.01 | 5.346                      | -0.540880 | 187.03 | 5.610                      | -0.540872 | 187.09 | 5.605                      |
| -0.540748 | 187.99 | 5.262                      | -0.540743 | 188.02 | 5.260                      | -0.540734 | 188.08 | 5.255                      |
| -0.540612 | 188.98 | 5.180                      | -0.540607 | 189.01 | 5.178                      | -0.540600 | 189.06 | 5.173                      |
| -0.540478 | 189.96 | 4.845                      | -0.540475 | 189.99 | 5.097                      | -0.540467 | 190.05 | 5.092                      |

<sup>a</sup> Width inaccurate due to strong background phase shift.

TABLE II. (Continued) Table of energy, effective quantum number, and width at half maximum in  $\text{cm}^{-1}$  for the resonances  $n = 191 - 230$  for  $J = 0 - 2$ . The resonances are calculated from the spectrum calculated from the total eigenphase of scattering matrix  $\mathbf{S}$ .

| $J = 0$   |        |                            | $J = 1$   |        |                            | $J = 2$   |        |                            |
|-----------|--------|----------------------------|-----------|--------|----------------------------|-----------|--------|----------------------------|
| E (au)    | $n$    | width ( $\text{cm}^{-1}$ ) | E (au)    | $n$    | width ( $\text{cm}^{-1}$ ) | E (au)    | $n$    | width ( $\text{cm}^{-1}$ ) |
| -0.540347 | 190.95 | 5.021                      | -0.540344 | 190.98 | 4.768                      | -0.540336 | 191.04 | 4.763                      |
| -0.540218 | 191.94 | 4.944                      | -0.540214 | 191.97 | 4.695                      | -0.540206 | 192.03 | 4.690                      |
| -0.540091 | 192.92 | 4.868                      | -0.540087 | 192.96 | 4.866                      | -0.540079 | 193.02 | 4.862                      |
| -0.539966 | 193.91 | 4.794                      | -0.539962 | 193.94 | 4.792                      | -0.539954 | 194.00 | 4.788                      |
| -0.539842 | 194.90 | 4.722                      | -0.539838 | 194.93 | 4.720                      | -0.539831 | 194.99 | 4.716                      |
| -0.539721 | 195.89 | 4.418                      | -0.539716 | 195.92 | 4.649                      | -0.539709 | 195.98 | 4.645                      |
| -0.539601 | 196.87 | 4.352                      | -0.539597 | 196.91 | 4.579                      | -0.539590 | 196.96 | 4.575                      |
| -0.539483 | 197.86 | 4.287                      | -0.539479 | 197.90 | 4.511                      | -0.539472 | 197.95 | 4.507                      |
| -0.539366 | 198.85 | 4.224                      | -0.539362 | 198.89 | 4.444                      | -0.539356 | 198.94 | 4.440                      |
| -0.539252 | 199.84 | 4.161                      | -0.539248 | 199.87 | 4.378                      | -0.539242 | 199.93 | 4.374                      |
| -0.539139 | 200.83 | 4.100                      | -0.539135 | 200.86 | 4.098                      | -0.539128 | 200.92 | 4.310                      |
| -0.539028 | 201.82 | 4.040                      | -0.539024 | 201.85 | 4.038                      | -0.539017 | 201.91 | 4.035                      |
| -0.538918 | 202.80 | 3.982                      | -0.538914 | 202.84 | 3.979                      | -0.538907 | 202.90 | 3.976                      |
| -0.538810 | 203.79 | 3.924                      | -0.538806 | 203.83 | 3.922                      | -0.538800 | 203.89 | 3.918                      |
| -0.538702 | 204.79 | 3.867                      | -0.538700 | 204.82 | 3.865                      | -0.538693 | 204.88 | 3.862                      |
| -0.538597 | 205.78 | 3.811                      | -0.538595 | 205.80 | 3.810                      | -0.538588 | 205.86 | 3.807                      |
| -0.538494 | 206.77 | 3.757                      | -0.538491 | 206.79 | 3.756                      | -0.538485 | 206.85 | 3.752                      |
| -0.538392 | 207.76 | 3.633                      | -0.538389 | 207.78 | 3.632                      | -0.538383 | 207.84 | 3.628                      |
| -0.538291 | 208.74 | 3.582                      | -0.538288 | 208.78 | 3.580                      | -0.538282 | 208.84 | 3.577                      |
| -0.538192 | 209.74 | 3.531                      | -0.538189 | 209.76 | 3.530                      | -0.538183 | 209.82 | 3.527                      |
| -0.538094 | 210.72 | 3.482                      | -0.538091 | 210.76 | 3.480                      | -0.538085 | 210.82 | 3.477                      |
| -0.537997 | 211.72 | 3.433                      | -0.537995 | 211.75 | 3.431                      | -0.537989 | 211.80 | 3.429                      |
| -0.537902 | 212.71 | 3.385                      | -0.537899 | 212.74 | 3.383                      | -0.537893 | 212.80 | 3.381                      |
| -0.537808 | 213.70 | 3.338                      | -0.537806 | 213.73 | 3.337                      | -0.537800 | 213.79 | 3.334                      |
| -0.537716 | 214.69 | 3.292                      | -0.537713 | 214.72 | 3.291                      | -0.537707 | 214.78 | 3.288                      |
| -0.537624 | 215.68 | 3.247                      | -0.537622 | 215.71 | 3.246                      | -0.537616 | 215.77 | 3.243                      |
| -0.537534 | 216.67 | 3.203                      | -0.537531 | 216.70 | 3.201                      | -0.537526 | 216.76 | 3.199                      |
| -0.537445 | 217.66 | 3.159                      | -0.537443 | 217.69 | 2.992                      | -0.537438 | 217.75 | 2.989                      |
| -0.537358 | 218.65 | 2.952                      | -0.537355 | 218.68 | 3.115                      | -0.537350 | 218.74 | 3.112                      |
| -0.537271 | 219.65 | 3.074                      | -0.537268 | 219.68 | 2.911                      | -0.537263 | 219.74 | 2.909                      |
| -0.537185 | 220.64 | 2.873                      | -0.537183 | 220.67 | 3.032                      | -0.537178 | 220.73 | 3.029                      |
| -0.537102 | 221.63 | 2.835                      | -0.537099 | 221.66 | 2.991                      | -0.537094 | 221.72 | 2.989                      |
| -0.537018 | 222.62 | 2.953                      | -0.537016 | 222.65 | 2.796                      | -0.537010 | 222.72 | 2.794                      |
| -0.536936 | 223.62 | 2.760                      | -0.536934 | 223.64 | 2.912                      | -0.536929 | 223.70 | 2.910                      |
| -0.536855 | 224.61 | 2.742                      | -0.536853 | 224.64 | 2.741                      | -0.536848 | 224.70 | 2.739                      |
| -0.536775 | 225.60 | 2.706                      | -0.536773 | 225.63 | 2.705                      | -0.536768 | 225.69 | 2.703                      |
| -0.536696 | 226.59 | 2.671                      | -0.536694 | 226.62 | 2.670                      | -0.536690 | 226.68 | 2.794                      |
| -0.536619 | 227.58 | 2.761                      | -0.536616 | 227.62 | 2.760                      | -0.536611 | 227.68 | 2.633                      |
| -0.536541 | 228.58 | 2.601                      | -0.536539 | 228.61 | 2.600                      | -0.536535 | 228.67 | 2.598                      |
| -0.536466 | 229.57 | 2.568                      | -0.536464 | 229.60 | 2.567                      | -0.536459 | 229.66 | 2.565                      |
| -0.536391 | 230.56 | 2.535                      | -0.536389 | 230.59 | 2.534                      | -0.536384 | 230.66 | 2.653                      |
| -0.536317 | 231.56 | 2.502                      | -0.536315 | 231.59 | 2.501                      | -0.536310 | 231.65 | 2.500                      |
| -0.536244 | 232.55 | 2.471                      | -0.536242 | 232.58 | 2.470                      | -0.536237 | 232.64 | 2.468                      |
| -0.536172 | 233.54 | 2.439                      | -0.536170 | 233.57 | 2.438                      | -0.536165 | 233.64 | 2.552                      |
| -0.536101 | 234.54 | 2.408                      | -0.536098 | 234.57 | 2.407                      | -0.536094 | 234.63 | 2.405                      |
